# Supplementary material for: Towards a Sustainable Reproduction Management of Dairy Sheep: Glycerol-Based Formulations as Alternative to eCG in Milked Ewes Mated at the End of Anoestrus Period
Source: MDPI journal article supplement (doi:10.3390/ani11040922), 2021-03-24
Supplement: s1 [file s1]

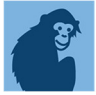

**Supplementary Table 1.** Body weight (BW), BCS and their variations (Dif.) during treatment period (between D-13 and D2) in ewes orally drenched with a glycerol-based formulation (GLU;  $n = 24$ ) or with water but receiving an eCG administration (GON;  $n = 24$ ). Mean  $\pm$  SE.

|                  | GLU                     |      | GON                     |      |
|------------------|-------------------------|------|-------------------------|------|
| BW1 D-13 (kg)    | 44.68 $\pm$             | 1.18 | 44.73 $\pm$             | 0.95 |
| BW2 D2 (kg)      | 44.69 $\pm$             | 1.25 | 45.86 $\pm$             | 0.92 |
| Dif BW2-BW1 (kg) | 0.01 <sup>a</sup> $\pm$ | 0.46 | 1.13 <sup>b</sup> $\pm$ | 0.26 |
| BCS1-D-13        | 2.57 $\pm$              | 0.05 | 2.56 $\pm$              | 0.04 |
| BCS2-D2          | 2.48 $\pm$              | 0.05 | 2.53 $\pm$              | 0.04 |
| Dif. BCS2-BCS1   | -0.09 $\pm$             | 0.04 | -0.02 $\pm$             | 0.04 |

Different letters designate difference between group means at  $p < 0.05$
